# Supplementary material for: Levee system transformation in coevolution between humans and water systems along the Kiso River, Japan
Source: Copernicus journal article supplement (doi:10.5194/hess-28-2329-2024), 2024-05-31
Supplement: Supplementary file 1 [file hess-28-2329-2024-supplement.pdf]

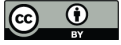

*Supplement of*

## **Levee system transformation in coevolution between humans and water systems along the Kiso River, Japan**

**Shinichiro Nakamura et al.**

*Correspondence to:* Shinichiro Nakamura ([shinichiro@civil.nagoya-u.ac.jp](mailto:shinichiro@civil.nagoya-u.ac.jp))

The copyright of individual parts of the supplement might differ from the article licence.

**Table S1** List of historic maps which used in this study. The year in the column indicates the survey year for each map.

**Maps of Survey Bureau, Army Department, General Staff Headquarters, Imperial Japanese Army (SAGIJ maps) [Scale: 1:20,000]**

| Era                | 1890s |
|--------------------|-------|
| Shimoike           | 1891  |
| Takada-cho         | 1891  |
| Tarui              | 1891  |
| Ikeno-mura         | 1891  |
| Kuwana             | 1891  |
| Fukaya-mura        | 1891  |
| Ohta-mura          | 1891  |
| Takasu             | 1891  |
| Funatsuki-mura     | 1891  |
| Ogaki              | 1891  |
| Name of map (area) | 1891  |
| Kitagata-cho       | 1891  |
| Kiso-kako          | 1891  |
| Kanie-cho          | 1891  |
| Tsushima-cho       | 1891  |
| Inazawa-cho        | 1891  |
| Takehana-cho       | 1891  |
| Kasamatsu-cho      | 1891  |
| Gifu               | 1891  |
| Kagamihara         | 1891  |
| Inuyama            | 1891  |

**Maps of Geospatial Information Authority of Japan (GIAJ maps) [Scale: 1:25,000]**

| Era                |             | 1920s | 1930s | 1940s | 1960s | 1980s | 1990s | 2000s |
|--------------------|-------------|-------|-------|-------|-------|-------|-------|-------|
| Name of map (area) | Komano      | 1920  | 1932  | 1959  | 1968  | 1984  | 1992  | 2007  |
|                    | Yoro        | 1920  | 1932  | 1959  | 1968  | 1984  | 1992  | 2007  |
|                    | Ogaki       | 1920  | 1932  | 1947  | 1970  | 1988  | 1994  | 2007  |
|                    | Ikeno       | 1920  | 1932  | 1947  | 1970  | 1984  | 1994  | 2007  |
|                    | Kuwana      | 1920  | 1932  | 1947  | 1968  | 1984  | 1993  | 2007  |
|                    | Yatomi      | 1920  | 1932  | 1947  | 1968  | 1984  | 1993  | 2000  |
|                    | Tsushima    | 1920  | 1932  | 1959  | 1968  | 1984  | 1992  | 2007  |
|                    | Takehana    | 1920  | 1932  | 1959  | 1968  | 1984  | 1992  | 2007  |
|                    | Gifu-seibu  | 1920  | 1932  | 1947  | 1970  | 1988  | 1994  | 2007  |
|                    | Kitagata    | 1920  | 1932  | 1947  | 1970  | 1988  | 1994  | 2007  |
|                    | Ichinomiya  | 1920  | 1932  | 1947  | 1968  | 1986  | 1992  | 2007  |
|                    | Kagamihara  | 1920  | 1932  | 1947  | 1970  | 1987  | 1992  | 2007  |
|                    | Gifu-hokubu | 1920  | 1932  | 1947  | 1970  | 1987  | 1992  | 2007  |
|                    | Inuyama     | 1920  | 1932  | 1947  | 1970  | 1987  | 1992  | 1997  |



**Table S2** List of data source of the historical evolution of the levee lengths and sociohydrological components in the Kiso River basin. The period covered is 1885-2015. The duration of each data period depends on the data availability.

| Data name                                                                                                                  | Data period                                                            | Source                                                                                                                                                                                                                                                        |
|----------------------------------------------------------------------------------------------------------------------------|------------------------------------------------------------------------|---------------------------------------------------------------------------------------------------------------------------------------------------------------------------------------------------------------------------------------------------------------|
| (a) Lengths of indigenous discontinuous and modern continuous levees                                                       | 1891–2007                                                              | Created by the authors in this study from the maps. See methods of data creation in the main body.                                                                                                                                                            |
| (b) Annual maximum discharges and design floods of the Kiso, Nagara, and Ibi Rivers                                        | Annual maximum discharges:<br>1895–2005<br>Design floods:<br>1887–2010 | Ministry of Land, Infrastructure, Transport and Tourism (MLIT): Draft document on design floods, Kiso River System Basic Policy for River Improvement, 2007.                                                                                                  |
| (c) Total dam storage within the Kiso River basin (Misogawa, Agigawa, Maruyama, Iwaya, Ataki, Yokoyama, and Tokuyama dams) | 1885–2010                                                              | Compiled by the authors the data from the dam construction years and storages described in the “Ministry of Land, Infrastructure, Transport and Tourism (MLIT): Draft document on design floods, Kiso River System Basic Policy for River Improvement, 2007.” |
| (d) Population within the basin                                                                                            | 1920–2015                                                              | Compiled by the authors from “Census of Population, e-Stat, the National Statistics Office, Ministry of Internal Affairs and Communications. <a href="https://www.e-stat.go.jp/">https://www.e-stat.go.jp/</a> ”                                              |
| (e) Paddy fields area and urban area within the basin                                                                      | 1891–2007                                                              | Created by the authors in this study from the maps. See methods of data creation in the main body.                                                                                                                                                            |
| (f) Rice production (Gifu Prefecture)                                                                                      | 1960–2015                                                              | Compiled by the authors from “Production and Agricultural Income Statistics, e-Stat, the National Statistics Office, Ministry of Internal Affairs and Communications. <a href="https://www.e-stat.go.jp/">https://www.e-stat.go.jp/</a> ”                     |
| (g) Land subsidence (at the lowest point of the Kiso River, Kuwana City)                                                   | 1961–2015                                                              | Subsidence Research Association of Three Prefectures in the Tokai Region: Subsidence in the Nobi Plain in 2016, 2017                                                                                                                                          |
| (h) Number of flood fighters (Gifu Prefecture)                                                                             | 1964–2015                                                              | Provided by the Gifu Prefectural Government                                                                                                                                                                                                                   |
